# Supplementary material
Source: PubMed Central journal article supplement (PMC7614121)
Supplement: EMS154747-supplement-Supplementary_material.pdf [file EMS154747-supplement-Supplementary_material.pdf]

## Supplementary tables and figures

Table S1. PP stratified by BP devices and invasive PP amplification quartiles.

| Variables                    | All   | Invasive PP amplification quartiles |       |       |       | p <sub>trend</sub> |
|------------------------------|-------|-------------------------------------|-------|-------|-------|--------------------|
|                              |       | Q1                                  | Q2    | Q3    | Q4    |                    |
| Device 1 (n=171)             |       |                                     |       |       |       |                    |
| Non-invasive measures        |       |                                     |       |       |       |                    |
| Estimated aortic PP          | 42±11 | 44±11                               | 43±10 | 42±14 | 39±10 | 0.224              |
| Cuff brachial PP             | 55±13 | 57±13                               | 55±12 | 55±15 | 54±12 | 0.719              |
| Estimated PP amplification   | 13±4  | 13±4                                | 12±4  | 13±3  | 15±4  | 0.025              |
| Invasive measures (mmHg)     |       |                                     |       |       |       |                    |
| Aortic PP                    | 60±19 | 68±17                               | 62±17 | 58±21 | 53±17 | 0.002              |
| Brachial PP                  | 70±18 | 70±17                               | 68±17 | 70±21 | 74±18 | 0.463              |
| PP amplification             | 10±8  | 2±2                                 | 6±1   | 12±2  | 22±7  | <0.001             |
| Device 2 (n=52)              |       |                                     |       |       |       |                    |
| Non-invasive measures (mmHg) |       |                                     |       |       |       |                    |
| Estimated aortic PP          | 43±11 | 47±11                               | 46±10 | 37±6  | 44±13 | 0.057              |
| Cuff brachial PP             | 50±11 | 50±10                               | 51±9  | 46±7  | 52±15 | 0.546              |
| Estimated PP amplification   | 6±5   | 3±2                                 | 5±5   | 10±3  | 8±5   | 0.001              |
| Invasive measures (mmHg)     |       |                                     |       |       |       |                    |
| Aortic PP                    | 60±17 | 68±17                               | 60±16 | 51±13 | 61±19 | 0.079              |
| Brachial PP                  | 70±17 | 71±16                               | 67±16 | 63±12 | 79±19 | 0.077              |
| PP amplification             | 10±6  | 3±2                                 | 6±1   | 12±2  | 18±2  | <0.001             |

Sphygmocor Xcel and Uscom BP+ were defined as Device 1 and Device 2 respectively

Data are mean ± standard deviation

PP: pulse pressure

Invasive PP amplification=Invasive brachial PP– invasive aortic PP

Table S2. Regression of central aortic PP on brachial PP measured via non-invasive cuff and invasive recordings

|                                  | n   | $\beta$ (95%CI)   | p      | $R^2$ † (95%CI)‡    | p      | RMSE (95%CI)‡        | p      |
|----------------------------------|-----|-------------------|--------|---------------------|--------|----------------------|--------|
| Device 1 - Unadjusted models     |     |                   |        |                     |        |                      |        |
| Estimated aortic PP ~ cuff PP    | 171 | 0.83 (0.79; 0.87) | <0.001 | 0.91 (0.88; 0.95)   |        | 3.33 (2.86; 3.81)    |        |
| Invasive aortic PP ~ brachial PP | 171 | 0.94 (0.87; 1.01) | <0.001 | 0.82 (0.76; 0.88)   |        | 8.04 (6.96; 9.13)    |        |
| <i>Difference</i> ‡              |     |                   |        | 0.10 (0.04; 0.16)   | <0.001 | -4.71 (-5.88; -3.54) | <0.001 |
| - Adjusted models*               |     |                   |        |                     |        |                      |        |
| Estimated aortic PP ~ cuff PP    | 164 | 0.79 (0.75; 0.84) | <0.001 | 0.92 (0.89; 0.95)   |        | 3.21 (2.69; 3.73)    |        |
| Invasive aortic PP ~ brachial PP | 164 | 0.84 (0.78; 0.91) | <0.001 | 0.88 (0.84; 0.92)   |        | 6.68 (5.86; 7.50)    |        |
| <i>Difference</i> ‡              |     |                   |        | 0.05 (0.01; 0.09)   | <0.001 | -3.47 (-4.42; -2.52) | <0.001 |
| Device 2 - Unadjusted models     |     |                   |        |                     |        |                      |        |
| Estimated aortic PP ~ cuff PP    | 52  | 0.93 (0.81; 1.05) | <0.001 | 0.82 (0.74; 0.90)   |        | 4.53 (3.72; 5.35)    |        |
| Invasive aortic PP ~ brachial PP | 52  | 0.94 (0.84; 1.05) | <0.001 | 0.87 (0.83; 0.91)   |        | 6.02 (5.20; 6.83)    |        |
| <i>Difference</i> ‡              |     |                   |        | -0.05 (-0.12; 0.02) | 0.163  | -1.49 (-2.57; -0.40) | <0.001 |
| - Adjusted models*               |     |                   |        |                     |        |                      |        |
| Estimated aortic PP ~ cuff PP    | 40  | 0.93 (0.81; 1.04) | <0.001 | 0.89 (0.83; 0.95)   |        | 3.76 (2.95; 4.57)    |        |
| Invasive aortic PP ~ brachial PP | 40  | 0.97 (0.84; 1.10) | <0.001 | 0.88 (0.83; 0.93)   |        | 6.00 (5.01; 6.99)    |        |
| <i>Difference</i> ‡              |     |                   |        | 0.01 (-0.04; 0.06)  | 0.731  | -2.24 (-3.28; -1.20) | <0.001 |

Sphygmocor Xcel and Uscom BP+ were defined as Device 1 and Device 2 respectively; Data are unstandardised beta (95% confident interval); \*models are adjusted for age, sex, height, and invasive aortic heart rate; †adjusted  $R^2$ ; ‡adjusted  $R^2$  (95%CI) and RMSE (95%CI) differences between non-invasive and invasive models calculated by bootstrapping with 2000 replications; PP: pulse pressure

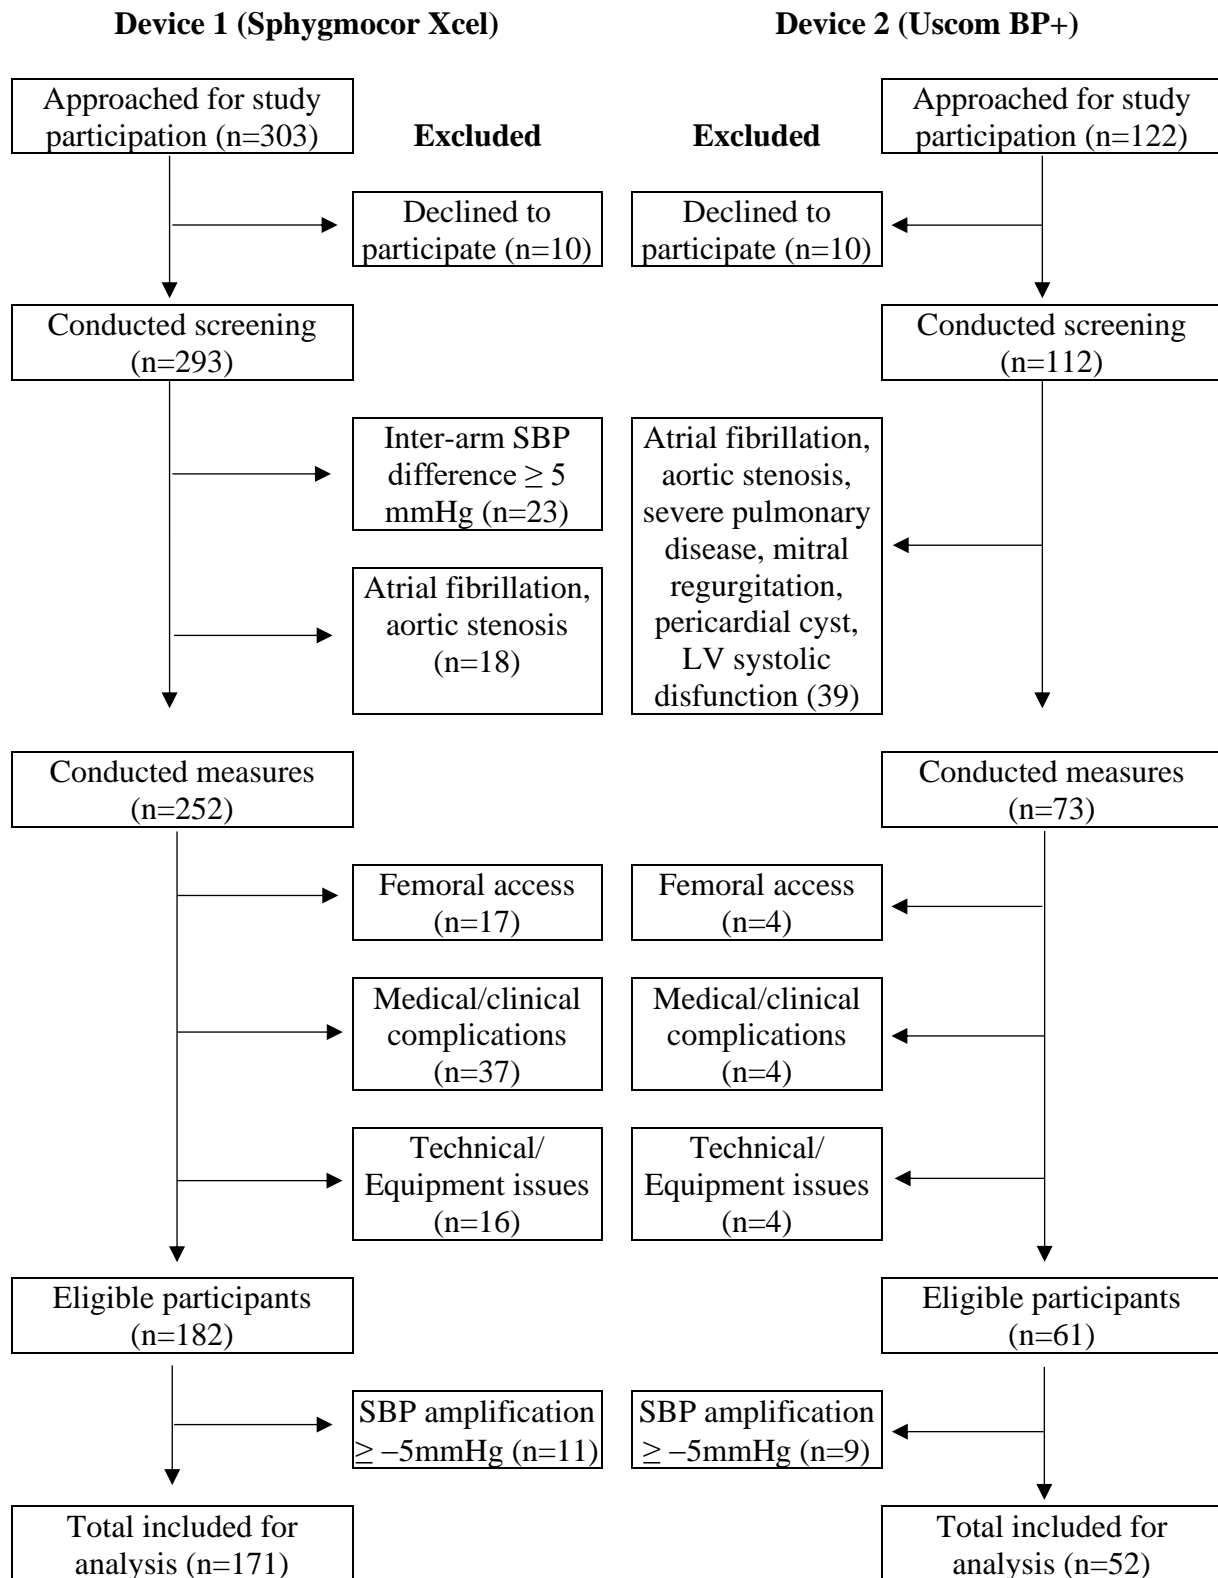

Figure S1. Participant flow showing exclusions from the analysis.

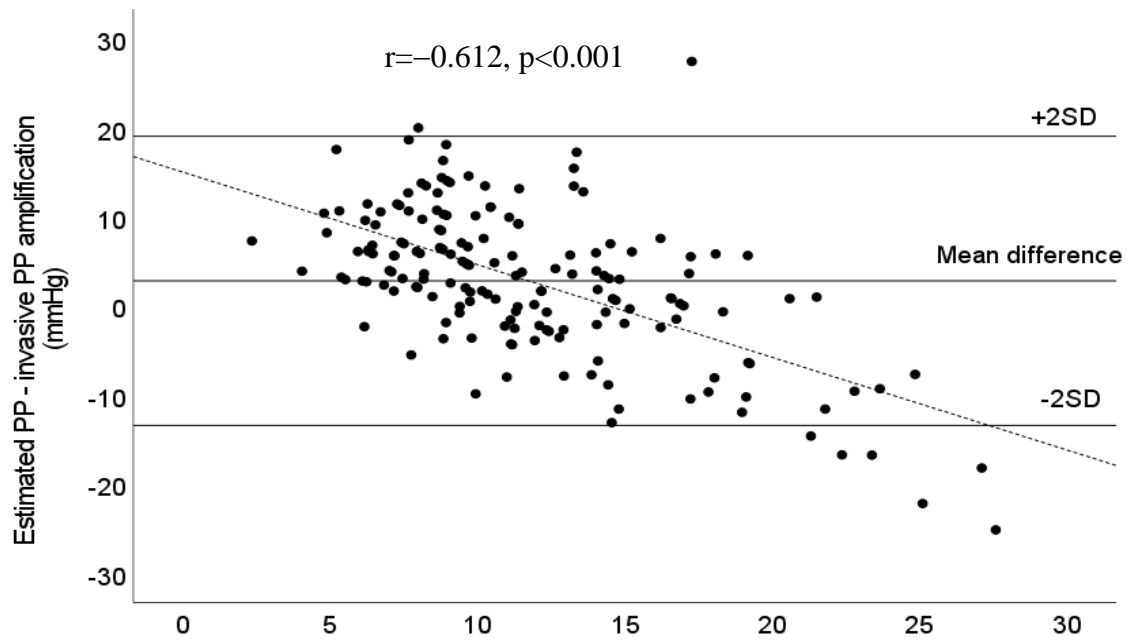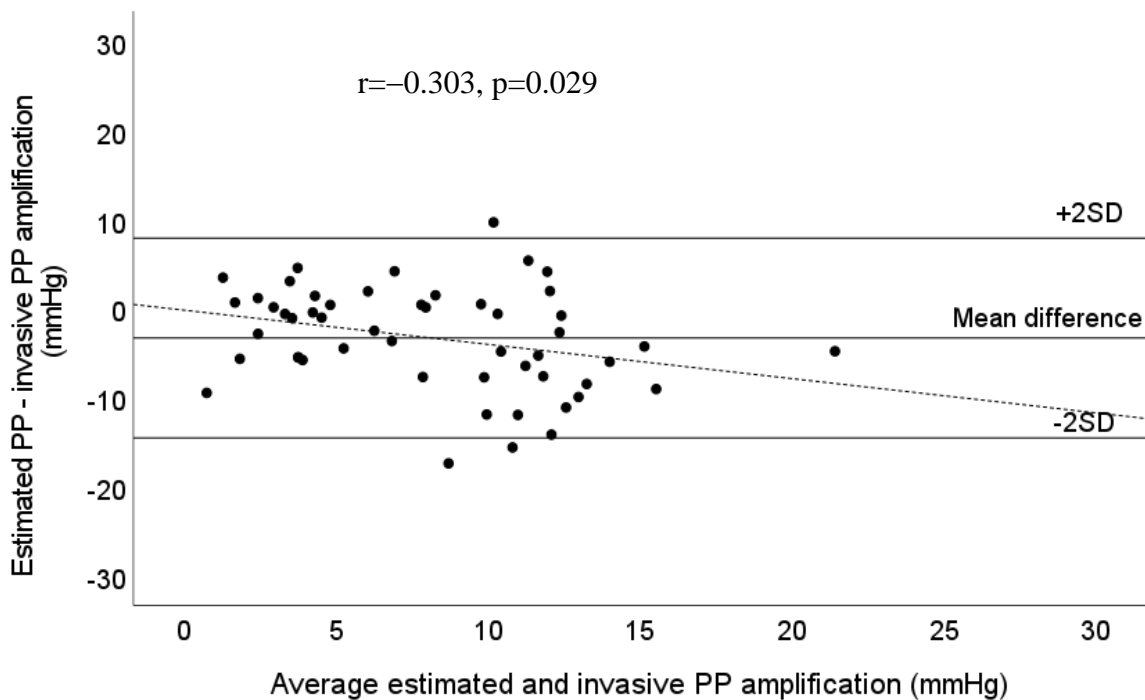

Figure S2. Bland-Altman plot of difference between estimated PP and invasive PP amplification from device 1 (Sphygmocor Xcel, top) and device 2 (Uscom, BP+, bottom). Dashed line is the line of best fit. Solid lines are mean difference and  $\pm 2$  SDs of the difference between estimated and invasive PP amplification. Bland-Altman plots indicate systematic bias for greater underestimation of PP amplification with increasing level of PP amplification, but with stronger bias for device 1 ( $r = -0.612$  vs.  $r = -0.303$ ;  $z = 4.16$ ;  $p < 0.001$ ).

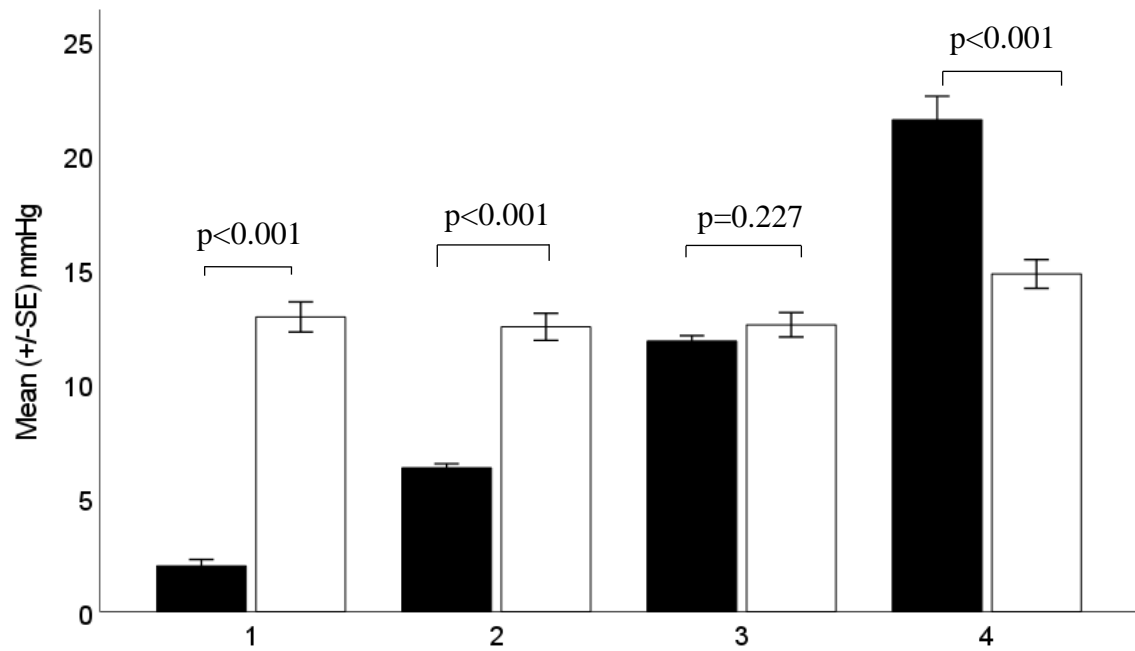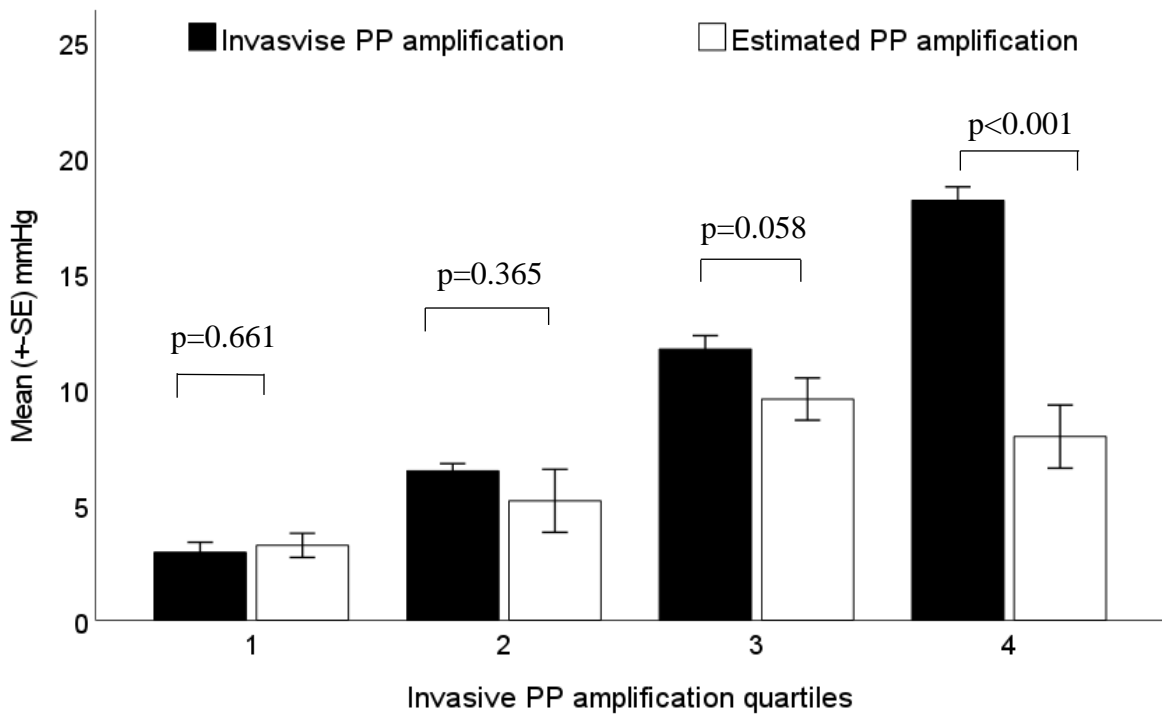

Figure S3. Bar plots (mean,  $\pm$ SE) of estimated SBP (white bars) and invasive PP amplification (black bars) per invasive PP amplification quartiles from device 1 (Sphygmocor Xcel, top) and device 2 (Uscom BP+, bottom). From the top figure, there was a stepwise increase in mean invasive PP amplification for each of elevated invasive PP quartile ( $p_{\text{trend}} < 0.001$ ) with estimated PP amplification was significantly overestimated at the first two quartiles ( $p = 0.001$ ) and underestimated at the highest quartile ( $p < 0.001$ ). At the bottom figure, underestimation of invasive PP amplification was consistent for the highest quartile ( $p < 0.001$ ) but not significant for other quartiles.
